# Supplementary material
Source: bioRxiv or medRxiv preprint supplement (https://www.biorxiv.org/highwire/filestream/112490/field_highwire_adjunct_files/12/355669-3.pdf)

**A**

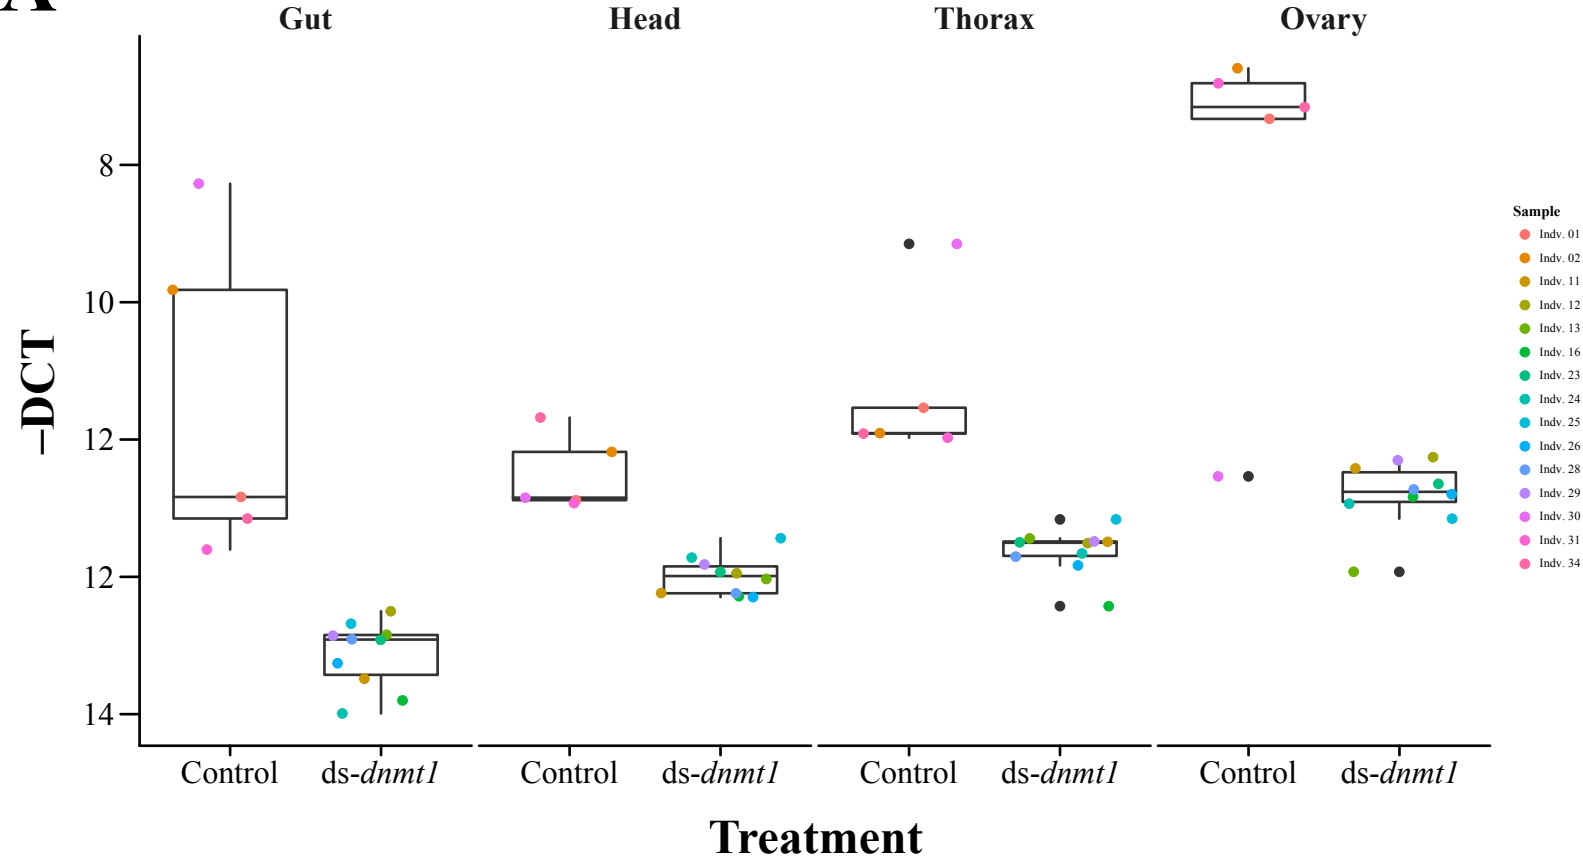

**B**

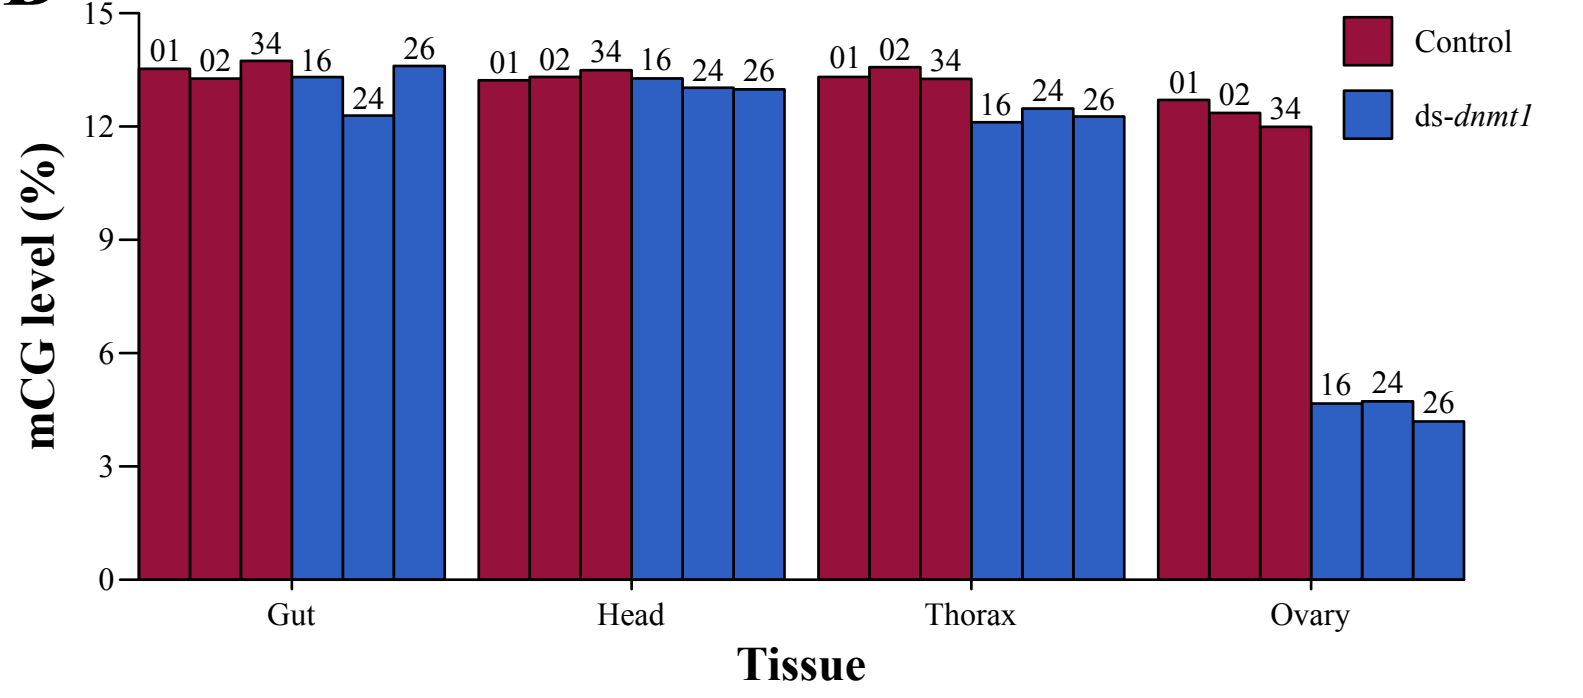

Supplement: Supplementary file [file 355669-3.pdf]
